# Supplementary material
Source: bioRxiv or medRxiv preprint supplement (https://www.biorxiv.org/highwire/filestream/15025/field_highwire_adjunct_files/4/054924-5.pdf)

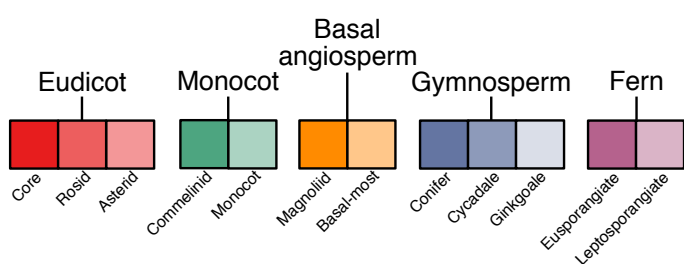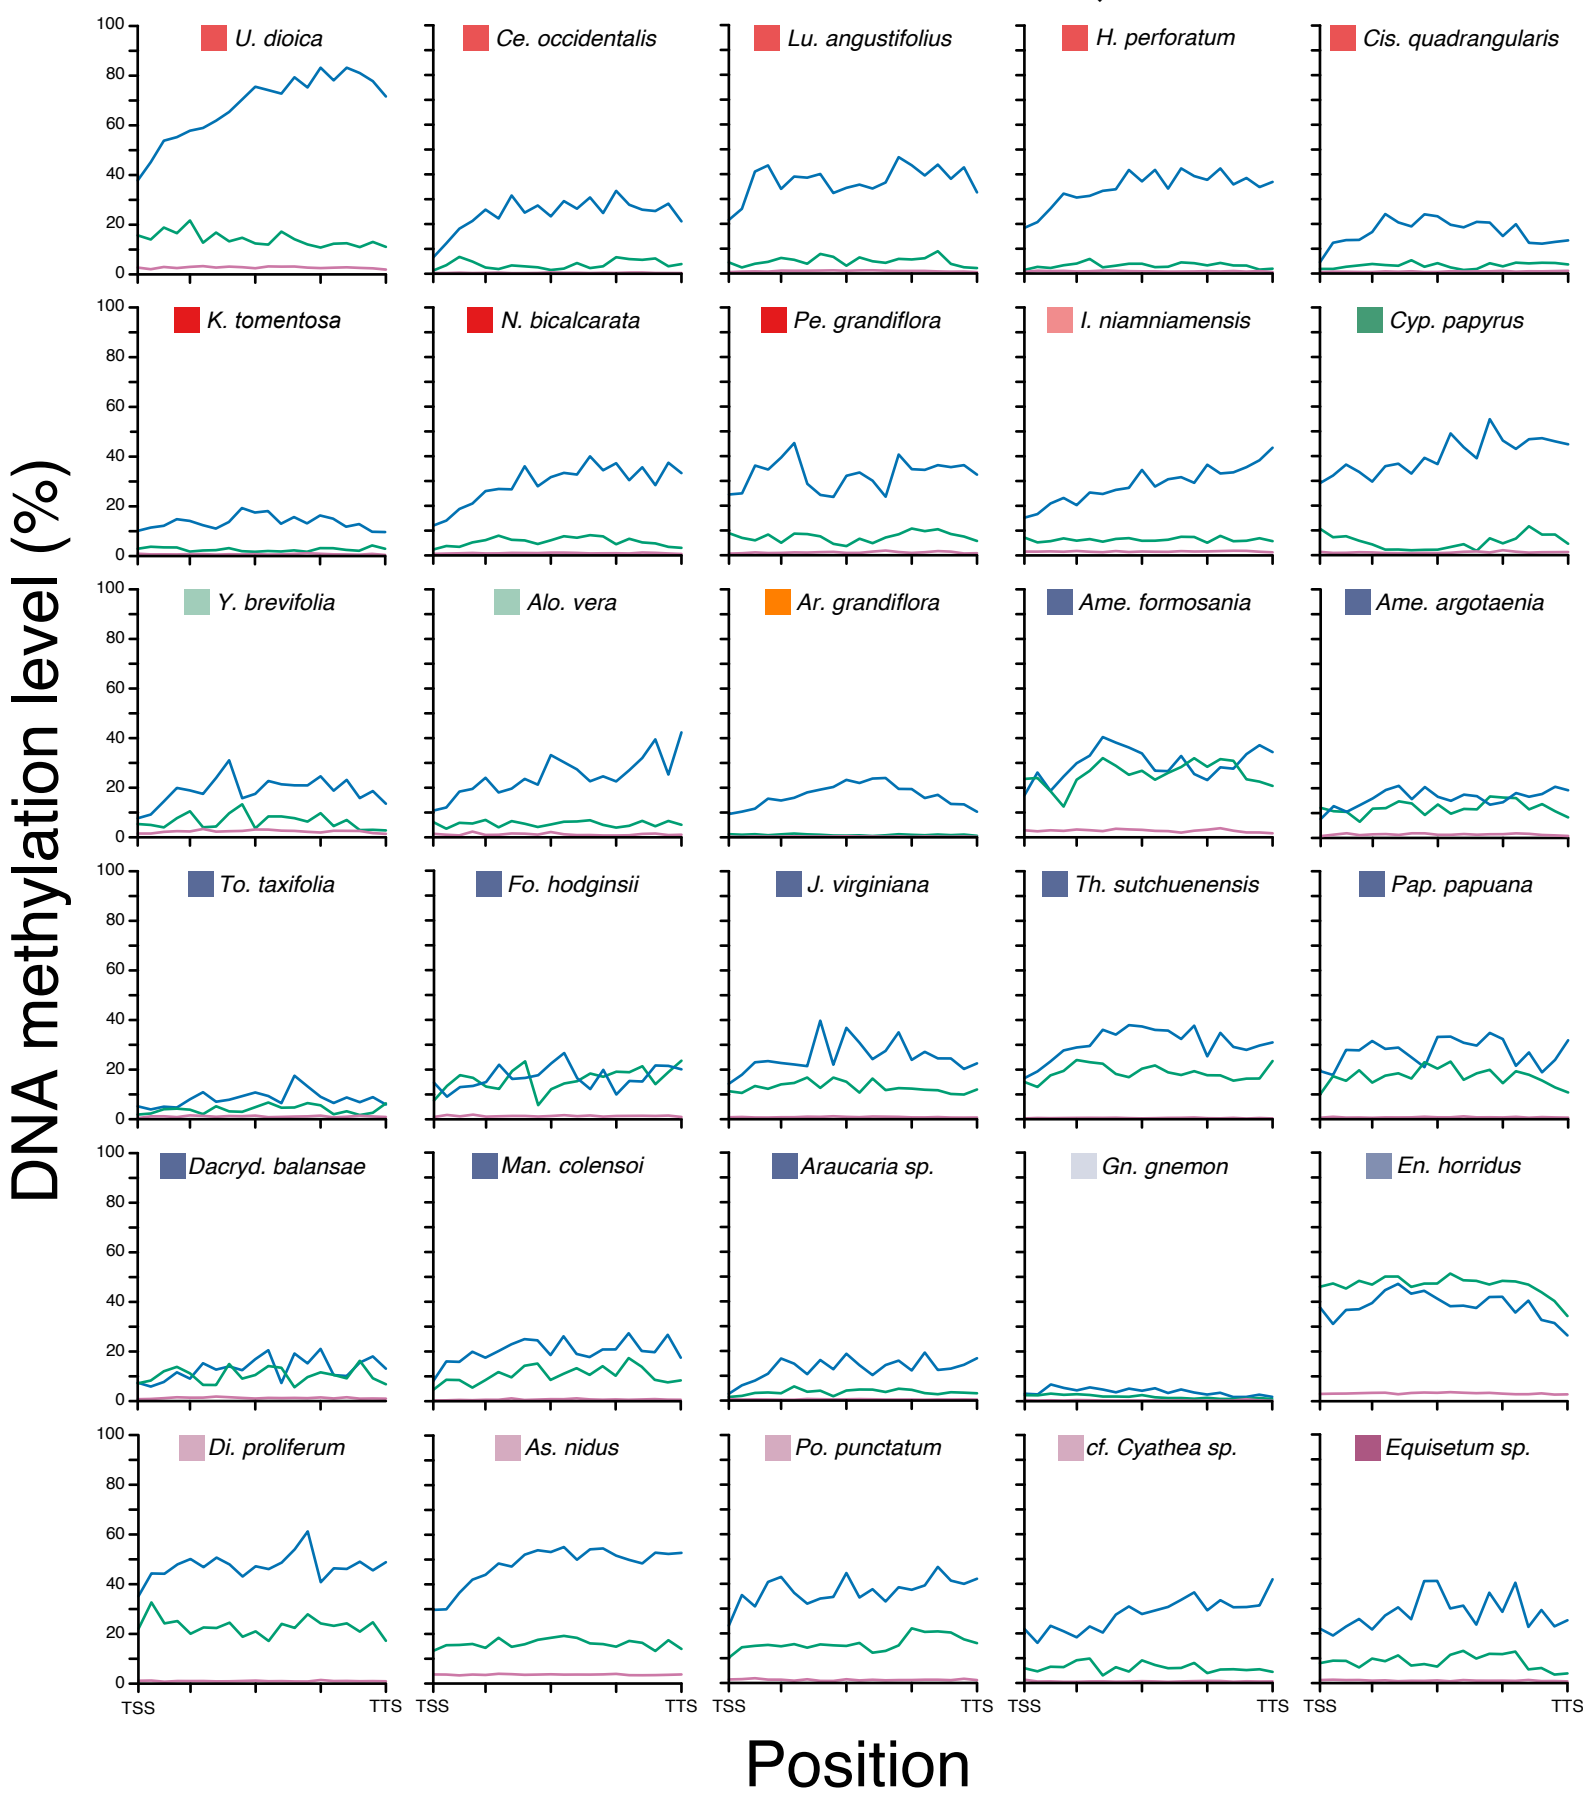

Supplement: Supplementary file [file 054924-5.pdf]
